# Supplementary material for: Chroogomphus rutilus Regulates Bone Metabolism to Prevent Periodontal Bone Loss during Orthodontic Tooth Movement in Osteoporotic Rats
Source: MDPI journal article supplement (doi:10.3390/nu15234906), 2023-11-24
Supplement: s1 [file s1]

# ***Chroogomphus rutilus* Regulates Bone Metabolism to Prevent Periodontal Bone Loss during Orthodontic Tooth Movement in Osteoporotic Rats**

**Ying Zhou <sup>1,2</sup>, Yanfeng Zhu <sup>3</sup>, Xinghui Jin <sup>3</sup>, Yongfeng Zhang <sup>4</sup>, Jiyu Song <sup>1,2</sup>, Zhina Wu <sup>1,2</sup>, Yutong Li <sup>1,2</sup>, Jingzheng Yi <sup>5</sup>, Di Wang <sup>3,4,\*</sup> and Min Hu <sup>1,2,\*</sup>**

<sup>1</sup> Department of Orthodontics, Hospital of Stomatology, Jilin University, Changchun 130021, China; zhouying21@mails.jlu.edu.cn (Y.Z.); songjy20@mails.jlu.edu.cn (J.S.); znwu22@mails.jlu.edu.cn (Z.W.); liyutong@jlu.edu.cn (Y.L.)

<sup>2</sup> Jilin Provincial Key Laboratory of Tooth Development and Bone Remodeling, Changchun 130021, China

<sup>3</sup> School of Life Sciences, Jilin University, Changchun 130012, China; zhuyf21@mails.jlu.edu.cn (Y.Z.); jinxh21@mails.jlu.edu.cn (X.J.)

<sup>4</sup> Engineering Research Center of Chinese Ministry of Education for Edible and Medicinal Fungi, Jilin Agricultural University, Changchun 130118, China; zhangyongfeng@jlu.edu.cn

<sup>5</sup> Western Dental Kids, Fresno, CA 93726, USA; yijingzheng1994@gmail.com

\* Correspondence: jluwangdi@jlu.edu.cn (D.W.); humin@jlu.edu.cn (M.H.)

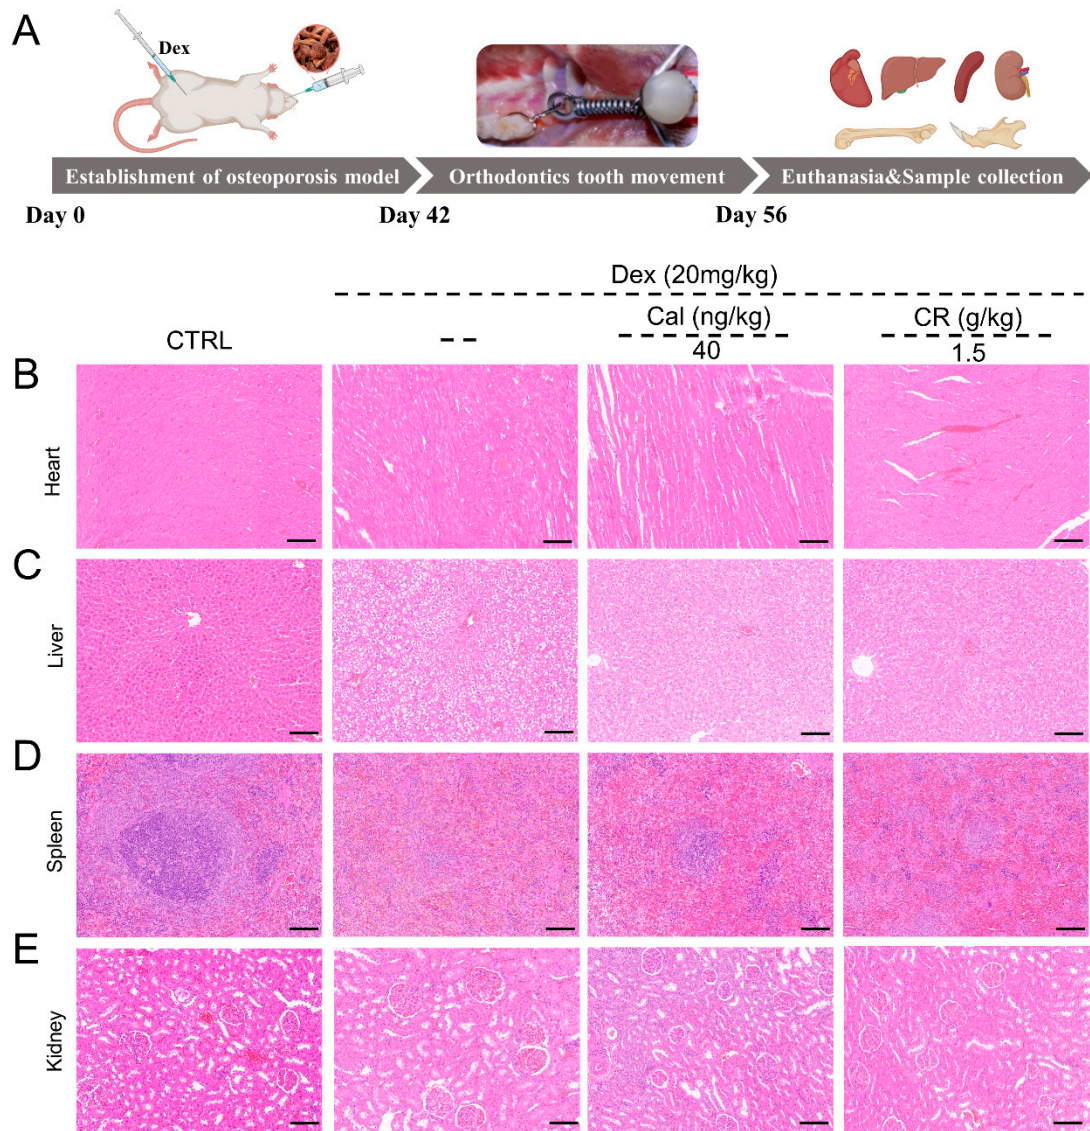

**Figure S1.** (A) Flow chart of animal experiment. H&E staining analysis of the (B) heart, (C) liver, (D) spleen, and (E) kidney of experimental rats ( $n = 3/\text{group}$ ,  $200\times$ , scale bar:  $50\ \mu\text{m}$ )

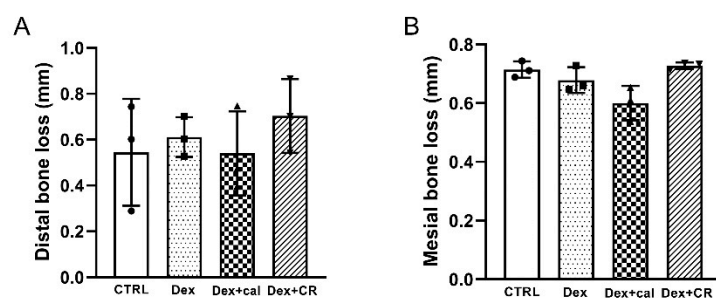

**Figure S2.** Mesial (A) and distal (B) bone loss for each group ( $n = 3/\text{group}$ ).

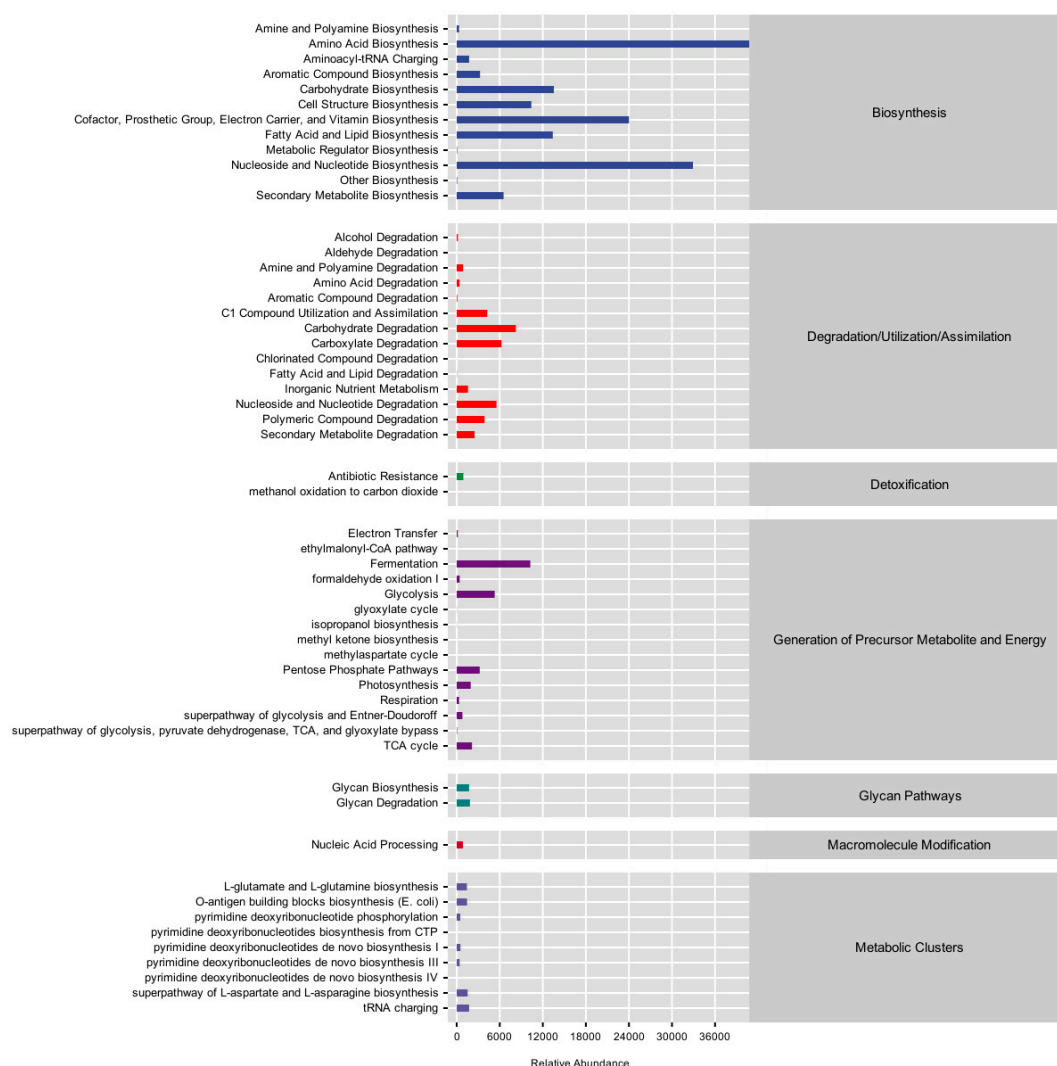

**Figure S3.** MetaCyc database-based functional pathway analysis.

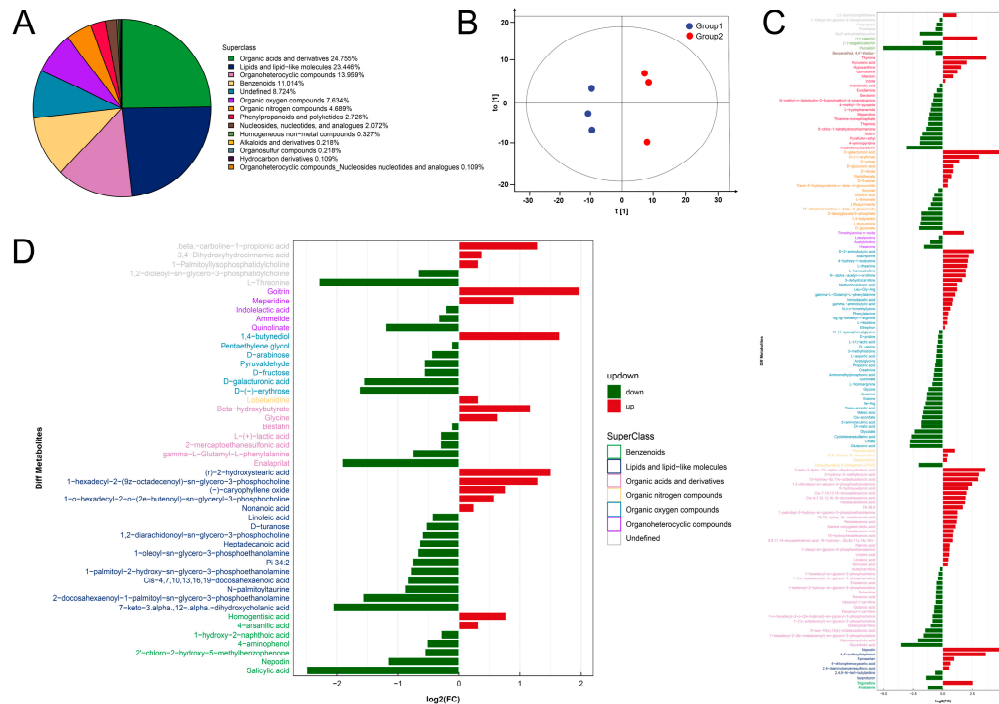

**Figure S4.** CR modified the metabolite levels in serum of osteoporosis (OP) rats. **(A)** Proportion of identified metabolites in each chemical class. **(B)** OPLS-DA score plots for the CTRL and vehicle-treated OP rats. **(C)** Differential fold analysis of significantly different metabolites between CTRL rats and vehicle-treated OP rats. **(D)** Differential fold analysis of significantly different metabolites between vehicle-treated and CR-treated OP rats ( $n = 3/\text{group}$ ).

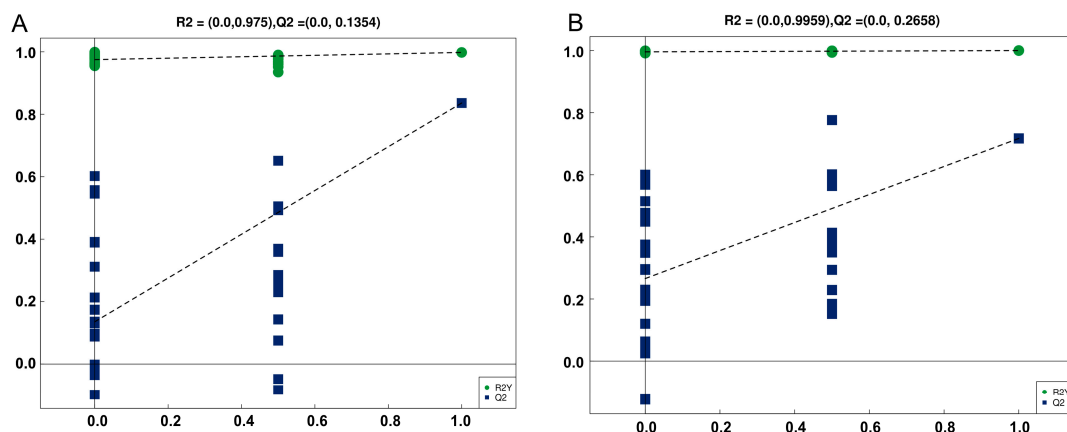

**Figure S5.** **(A)** OPLS-DA permutation test for the CTRL and vehicle-treated OP rats; **(B)** OPLS-DA permutation test for the vehicle-treated and CR-treated OP rats

**Table S1.** Details of antibodies used in IHC

| Antibody         | Molecular | Catalog number | Dilution for IHC | Company  | Area           |
|------------------|-----------|----------------|------------------|----------|----------------|
| Runx2            | 57 kDa    | AF5186         | 1:200            | Affinity | Jiangsu, China |
| Osterix          | 45 kDa    | DF7731         | 1:200            | Affinity | Jiangsu, China |
| OPG              | 46 kDa    | DF6824         | 1:200            | Affinity | Jiangsu, China |
| Rankl            | 35 kDa    | AF0313         | 1:200            | Affinity | Jiangsu, China |
| Wnt1             | 49 kDa    | A2475          | 1:200            | Abclonal | Wuhan, China   |
| GSK-3 $\beta$    | 46 kDa    | A2081          | 1:200            | Abclonal | Wuhan, China   |
| $\beta$ -catenin | 86 kDa    | Bs-1165R       | 1:500            | Bioss    | Beijing, China |
| TNF- $\alpha$    | 48 kDa    | A0277          | 1:200            | Abclonal | Wuhan, China   |
| IL-1 $\beta$     | 32 kDa    | Bs-0812R       | 1:500            | Bioss    | Beijing, China |
| IL-6             | 24 kDa    | DF6087         | 1:200            | Affinity | Jiangsu, China |

**Table S2.** The effect of CR on bodyweight and organ indexes in OP rats.

|                 | Days                 | CTRL           | Dex (20 mg/kg)                |                          |                          |
|-----------------|----------------------|----------------|-------------------------------|--------------------------|--------------------------|
|                 |                      |                | --                            | Cal (40 ng/kg)           | CR (1.5 g/kg)            |
| Body weight (g) | 0 day                | 220.11 ± 11.05 | 224.09 ± 7.84                 | 226.53 ± 5.94            | 227.91 ± 7.47            |
|                 | 7 <sup>th</sup> day  | 267.30 ± 13.70 | 184.13 ± 9.12 <sup>###</sup>  | 191.07 ± 16.63           | 193.36 ± 14.85           |
|                 | 14 <sup>th</sup> day | 323.56 ± 24.16 | 217.66 ± 53.17 <sup>###</sup> | 194.35 ± 18.78           | 193.05 ± 20.67           |
|                 | 21 <sup>st</sup> day | 342.69 ± 31.46 | 216.24 ± 54.80 <sup>###</sup> | 201.98 ± 15.72           | 189.89 ± 25.48           |
|                 | 28 <sup>th</sup> day | 323.59 ± 23.59 | 187.71 ± 7.67 <sup>###</sup>  | 196.09 ± 18.30           | 189.18 ± 15.84           |
|                 | 35 <sup>th</sup> day | 354.61 ± 22.33 | 206.91 ± 52.48 <sup>###</sup> | 194.08 ± 15.17           | 189.49 ± 9.44            |
|                 | 42 <sup>nd</sup> day | 361.57 ± 21.07 | 199.44 ± 54.73 <sup>###</sup> | 177.86 ± 22.08           | 209.96 ± 13.58           |
|                 | 49 <sup>th</sup> day | 334.35 ± 19.17 | 199.14 ± 46.87 <sup>###</sup> | 183.62 ± 24.18           | 209.68 ± 19.42           |
|                 | 56 <sup>th</sup> day | 320.51 ± 22.19 | 189.14 ± 44.04 <sup>###</sup> | 193.79 ± 19.47           | 204.58 ± 17.47           |
| Organ Index (%) | Heart                | 0.39 ± 0.58    | 0.58 ± 0.78 <sup>###</sup>    | 0.51±0.72                | 0.65±1.01                |
|                 | Liver                | 2.45 ± 0.25    | 5.84 ± 0.87 <sup>###</sup>    | 3.82±0.53 <sup>***</sup> | 3.81±0.54 <sup>***</sup> |
|                 | Spleen               | 0.14 ± 0.34    | 0.16 ± 0.34                   | 0.19±0.42                | 0.16±0.46                |
|                 | Kidney               | 0.68 ± 0.33    | 1.08 ± 0.93 <sup>###</sup>    | 1.03±0.89                | 1.05±2.12                |

The data were analyzed using a one-way ANOVA and expressed as mean  $\pm$  SEM ( $n = 15/\text{group}$ ) <sup>###</sup> $P < 0.001$  *versus* CTRL rats; <sup>\*\*\*</sup> $P < 0.001$  *versus* vehicle-treated OP rats.

**Table S3.** Relative abundance of top 20 genera.

| <b>Taxa</b>              | <b>Group1</b> | <b>Group2</b> | <b>Group3</b> |
|--------------------------|---------------|---------------|---------------|
| <i>Faecalibaculum</i>    | 0.1208        | 0.3410        | 0.2241        |
| <i>Muribaculum</i>       | 0.0552        | 0.0753        | 0.1067        |
| <i>Lactobacillus</i>     | 0.0064        | 0.1702        | 0.0181        |
| <i>Akkermansia</i>       | 0.1216        | 0.0000        | 0.0000        |
| <i>Desulfovibrio</i>     | 0.0156        | 0.0042        | 0.0115        |
| <i>Bacteroides</i>       | 0.0067        | 0.0032        | 0.0170        |
| <i>Helicobacter</i>      | 0.0073        | 0.0062        | 0.0120        |
| <i>Lachnoclostridium</i> | 0.0071        | 0.0044        | 0.0135        |
| <i>Ruminococcus</i>      | 0.0115        | 0.0015        | 0.0050        |
| <i>Escherichia</i>       | 0.0016        | 0.0119        | 0.0028        |
| <i>Turicibacter</i>      | 0.0092        | 0.0025        | 0.0025        |
| <i>Prevotella</i>        | 0.0022        | 0.0008        | 0.0092        |
| <i>Clostridium</i>       | 0.0078        | 0.0034        | 0.0008        |
| <i>Streptococcus</i>     | 0.0007        | 0.0079        | 0.0012        |
| <i>Faecalibacterium</i>  | 0.0074        | 0.0000        | 0.0018        |
| <i>Aerococcus</i>        | 0.0073        | 0.0008        | 0.0000        |
| <i>Alistipes</i>         | 0.0039        | 0.0010        | 0.0030        |
| <i>Eisenbergiella</i>    | 0.0010        | 0.0005        | 0.0046        |
| <i>Oscillibacter</i>     | 0.0026        | 0.0000        | 0.0030        |
| <i>Flavonifractor</i>    | 0.0030        | 0.0001        | 0.0014        |

Data are presented as the mean ( $n = 3/\text{group}$ ). Group 1: CTRL rats; group 2: vehicle-treated OP rats; group 3: CR-treated OP rats.

**Table S4.** The differential metabolites of serum among experimental rats.

| Metabolites                      | Group1     | Group2     | Group3     | Group1 vs Group2 |                 | Group2 vs Group3 |                 |
|----------------------------------|------------|------------|------------|------------------|-----------------|------------------|-----------------|
|                                  |            |            |            | VIP              | <i>P</i> -value | VIP              | <i>P</i> -value |
| D-(-)-erythrose                  | 25577805   | 187907396  | 64982362   | 1.579            | 0.020           | 1.677            | 0.031           |
| Linoleic acid                    | 1190670335 | 1868923221 | 1293795241 | 3.113            | 0.002           | 3.340            | 0.033           |
| D-fructose                       | 1033144948 | 1597061782 | 1030726929 | 2.837            | 0.018           | 3.390            | 0.027           |
| D-galacturonic acid              | 7062557    | 317184933  | 111059612  | 2.215            | 0.013           | 2.100            | 0.048           |
| Pyruvaldehyde                    | 169621683  | 255993382  | 164406299  | 1.120            | 0.037           | 1.331            | 0.042           |
| (-)-caryophyllene oxide          | 15619361   | 9533056    | 15298358   | 1.246            | 0.008           | 1.398            | 0.002           |
| O-LPE                            | 24063556   | 34451194   | 21924960   | 1.571            | 0.014           | 1.877            | 0.007           |
| Gamma-L-Glutamyl-L-phenylalanine | 9673371    | 23064031   | 13855925   | 1.861            | 0.000           | 1.575            | 0.015           |
| LPE (16:0)                       | 108250428  | 250992724  | 155883221  | 6.013            | 0.000           | 5.116            | 0.018           |
| C16-20:4 PC                      | 122796151  | 65626677   | 101577835  | 3.826            | 0.046           | 3.284            | 0.035           |
| PE (16:0/22: 6)                  | 1940802    | 10506550   | 4237365    | 1.467            | 0.001           | 1.311            | 0.037           |
| DOPC                             | 50772497   | 48838416   | 28472184   | 0.767            | 0.898           | 2.318            | 0.041           |
| Gamma-glutamylvaline             | 36913530   | 29485709   | 37748683   | 1.584            | 0.021           | 1.681            | 0.021           |
| Phosphocreatine                  | 9776492    | 1430439    | 4445177    | 1.475            | 0.001           | 0.907            | 0.042           |
| PE (18:0/22:6)                   | 1400720    | 9318459    | 4047688    | 1.415            | 0.006           | 1.122            | 0.047           |

Data are presented as the mean ( $n = 3/\text{group}$ ). Differences were considered statistically significant at  $P < 0.05$  and  $\text{VIP} > 1$ . Group 1: CTRL rats; group 2: vehicle-treated OP rats; group 3: CR-treated OP rats.
